# Supplementary material for: Adaptive Mistranslation Accelerates the Evolution of Fluconazole Resistance and Induces Major Genomic and Gene Expression Alterations in Candida albicans
Source: PubMed Central journal article supplement (PMC5549176; doi:10.1128/msphere.00167-17), 2017-08-09
Supplement: sph004172333sf5.pdf [file sph004172333sf5.pdf]

Fig. S5A

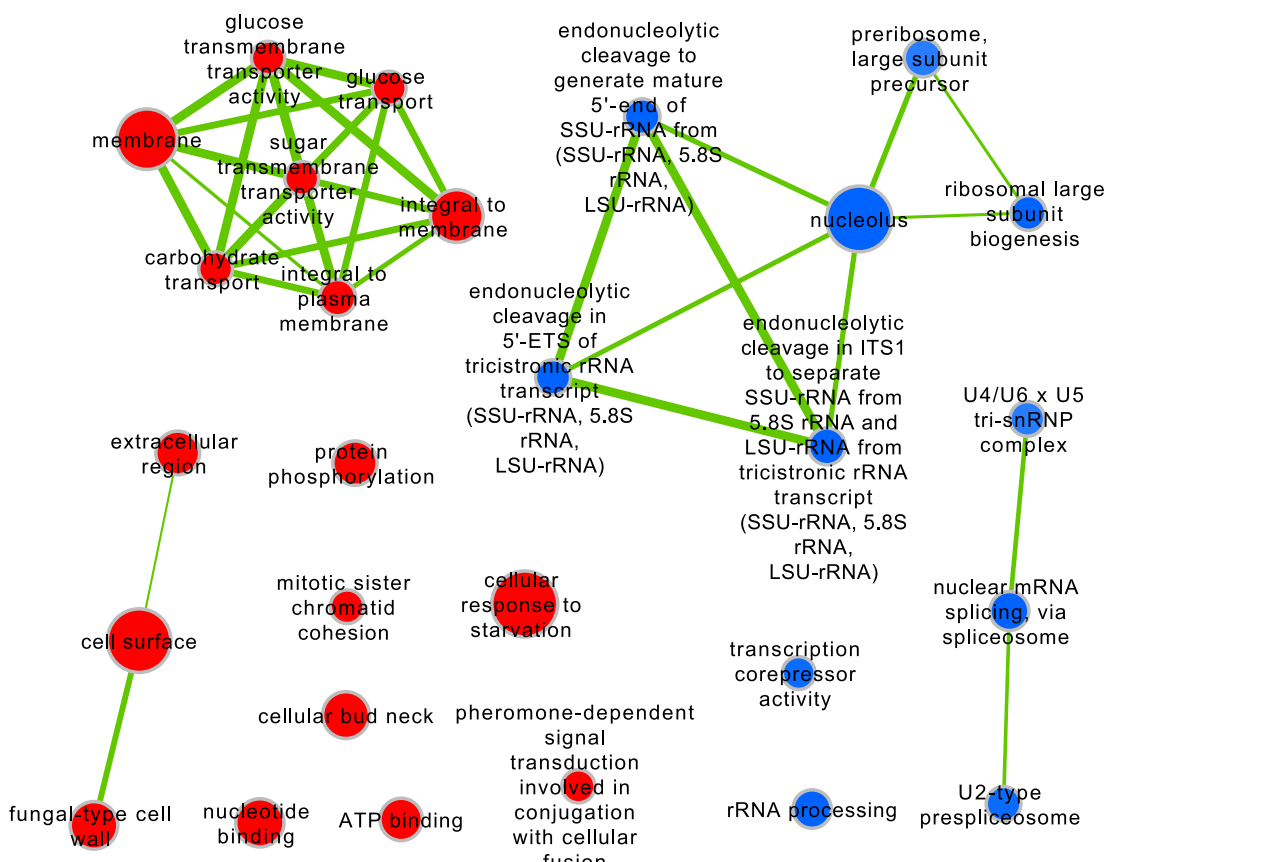

Fig. S5B

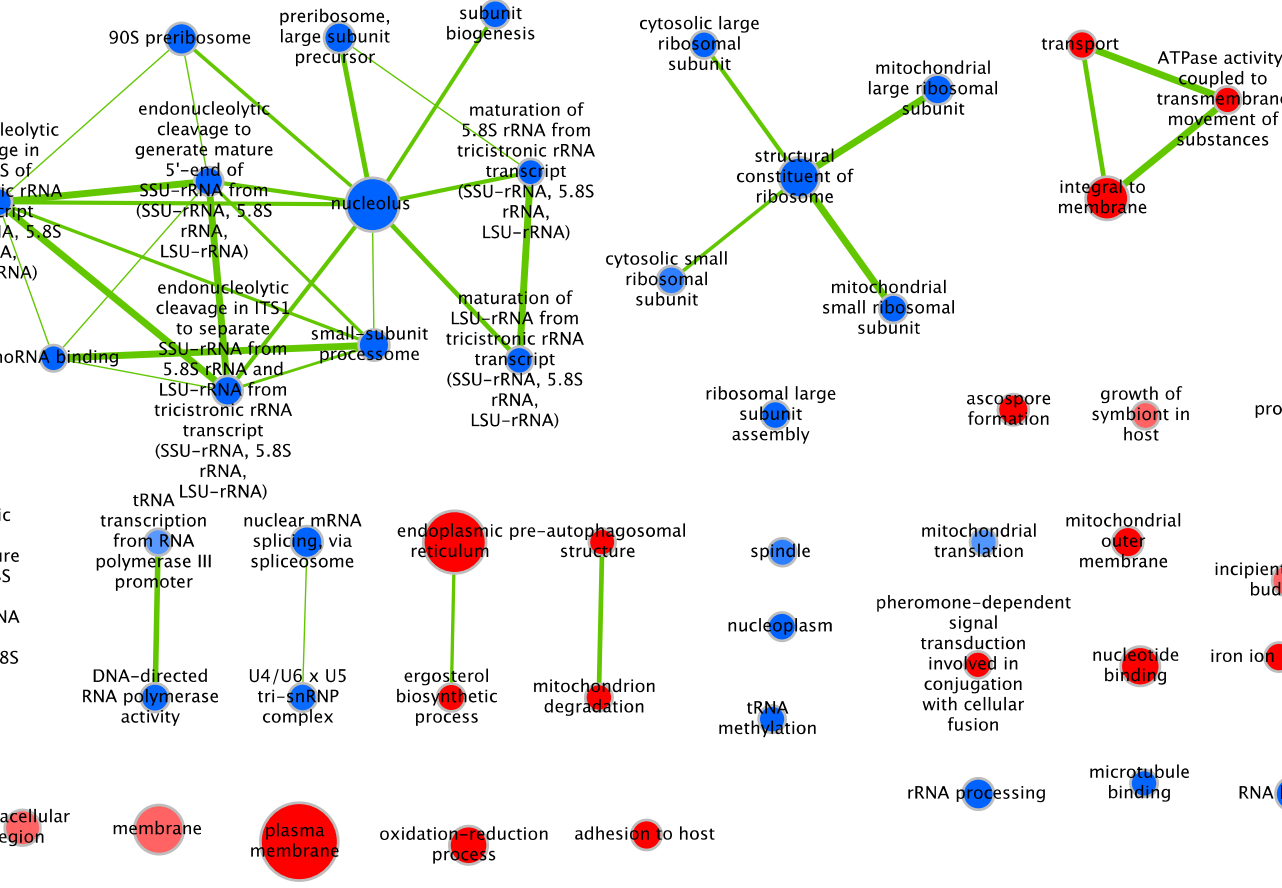

Fig. S5C

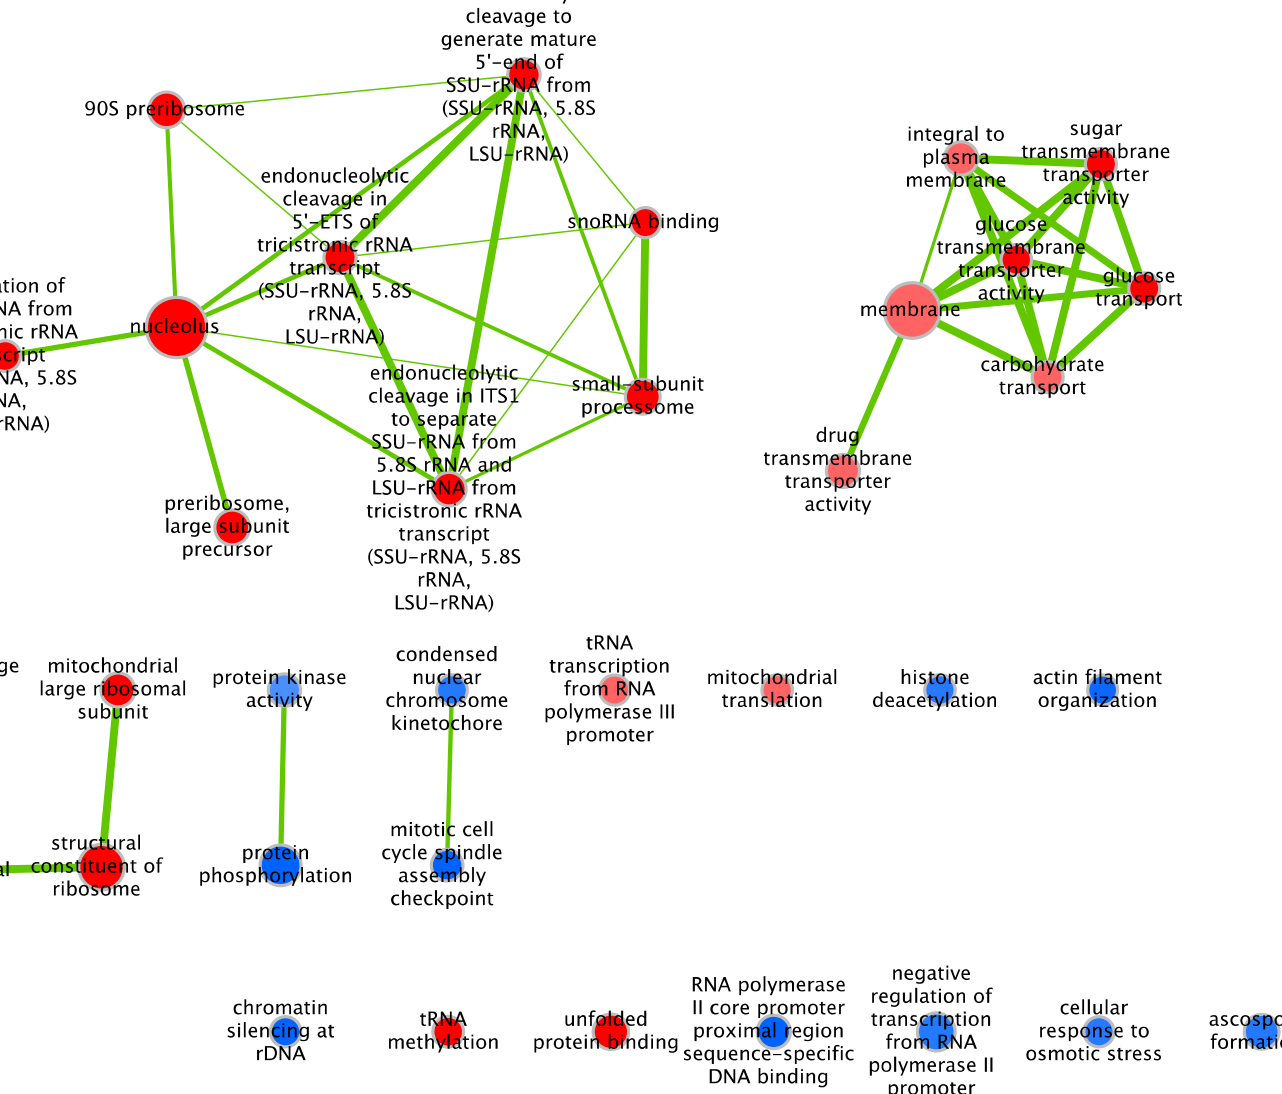

**Top10 ranked gene list for Networks:**

| T1FH vs T0FH<br>Fig.S5A                                                                                  | T1FH vs T1NF<br>Fig.S5B                                                                               | T1NF vs T1<br>Fig.S5C                                                                                        |
|----------------------------------------------------------------------------------------------------------|-------------------------------------------------------------------------------------------------------|--------------------------------------------------------------------------------------------------------------|
| MFALPHA<br>orf19.4653<br>CEK2<br>STE3<br>HGT17<br>orf19.552<br>HGT10<br>orf19.7056<br>orf19.1736<br>PSO2 | FRP1<br>MFALPHA<br>orf19.1691<br>ADH3<br>orf19.265<br>orf19.849<br>HGT17<br>CEK2<br>ATO9<br>orf19.929 | orf19.4342<br>orf19.6487<br>orf19.341<br>LDG3<br>orf19.3908<br>MET3<br>HGT10<br>orf19.6484<br>HGT12<br>PGA31 |
| THI4<br>PBR1<br>orf19.7283<br>GTT12<br>OBPA<br>HAL9<br>orf19.7330<br>PAP1<br>PIKA<br>MTLA1               | OBPA<br>AAH1<br>RHD2<br>HNM3<br>PIKA<br>MTLA1<br>PGA31<br>PAP1<br>HAL9<br>orf19.6487                  | orf19.725<br>MYO1<br>orf19.2629<br>orf19.6982<br>RSN1<br>orf19.188<br>orf19.1691<br>AQY1<br>PLB1<br>RNR22    |
