# Supplementary material for: Adaptive Mistranslation Accelerates the Evolution of Fluconazole Resistance and Induces Major Genomic and Gene Expression Alterations in Candida albicans
Source: PubMed Central journal article supplement (PMC5549176; doi:10.1128/msphere.00167-17), 2017-08-09
Supplement: sph004172333sf6.pdf [file sph004172333sf6.pdf]

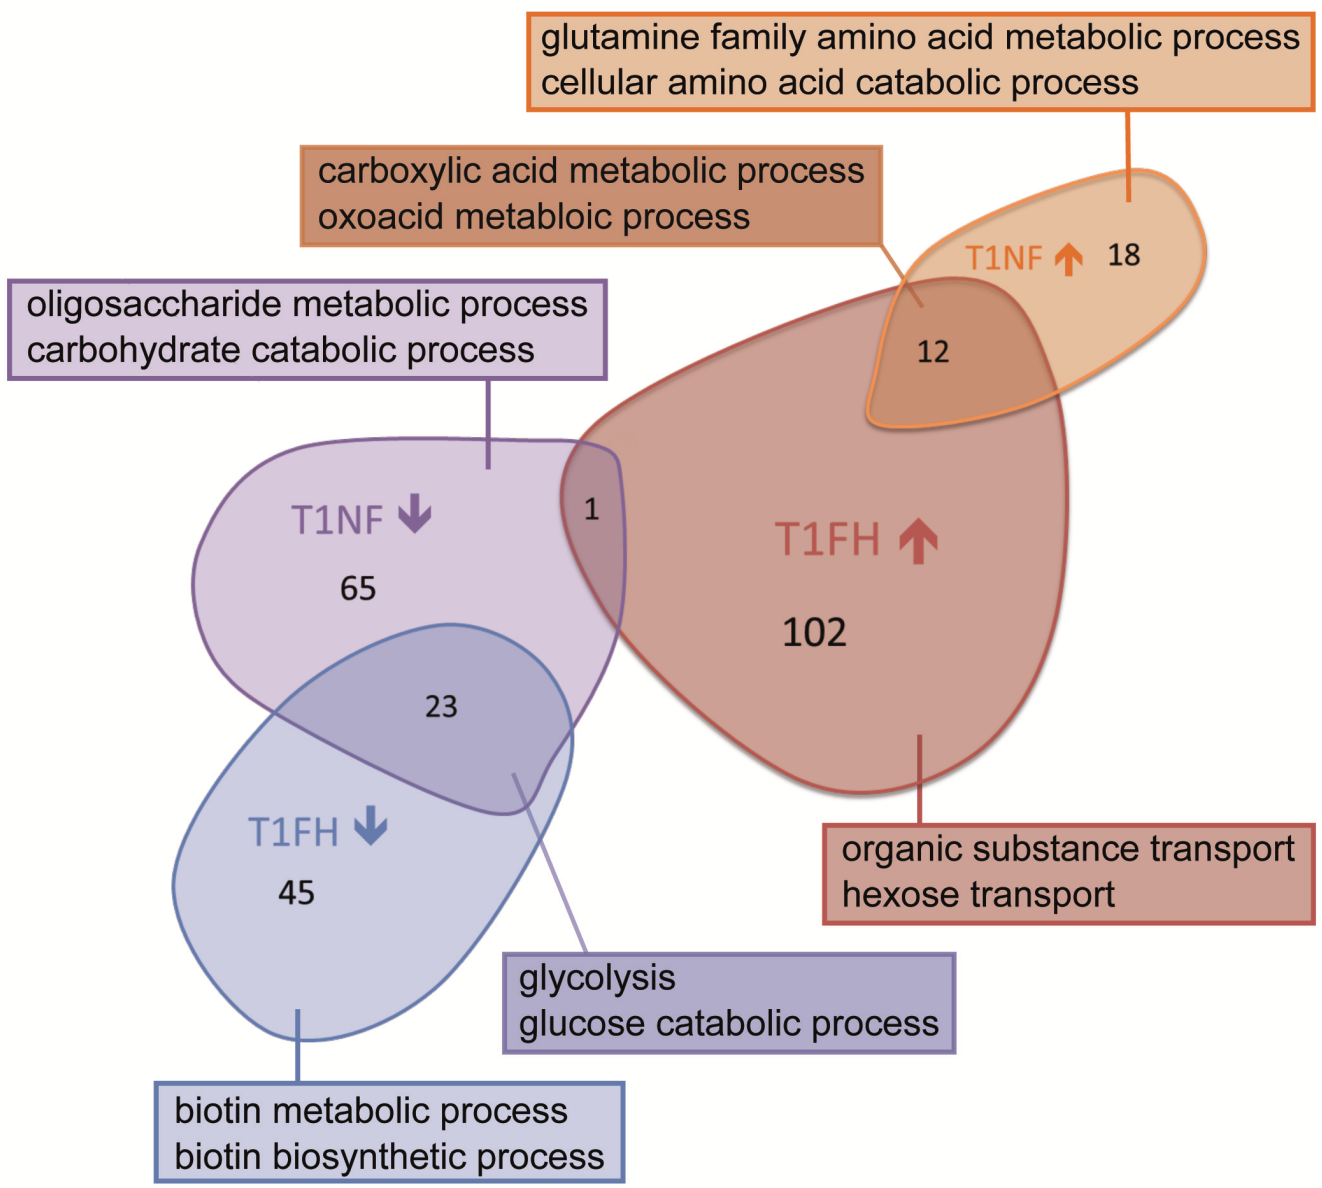

| GO.ID                                  | Term                                                                                 | p-value  | dgenes                                                                                                                |
|----------------------------------------|--------------------------------------------------------------------------------------|----------|-----------------------------------------------------------------------------------------------------------------------|
| <b>down-regulated in T1NF and T1FH</b> |                                                                                      |          |                                                                                                                       |
| GO:0006096                             | glycolysis                                                                           | 0.0038   | GPM2, PFK1                                                                                                            |
| GO:0006007                             | glucose catabolic process                                                            | 0.0089   | GPM2, PFK1                                                                                                            |
| <b>down-regulated in T1NF</b>          |                                                                                      |          |                                                                                                                       |
| GO:0009311                             | oligosaccharide metabolic process                                                    | 0.00014  | TPS1, AMS1, HSP21, orf19.4488                                                                                         |
| GO:0016052                             | carbohydrate catabolic process                                                       | 0.00036  | PFK2, GLK4, GPH1, AMS1, orf19.4488                                                                                    |
| GO:0005984                             | disaccharide metabolic process                                                       | 0.00042  | TPS1, HSP21, orf19.4488                                                                                               |
| GO:0016137                             | glycoside metabolic process                                                          | 0.00042  | TPS1, HSP21, orf19.4488                                                                                               |
| GO:0005975                             | carbohydrate metabolic process                                                       | 0.00324  | DAK2, PFK2, TPS1, GLK4, GPH1, AMS1, HSP21, orf19.4488                                                                 |
| GO:0005991                             | trehalose metabolic process                                                          | 0.00366  | TPS1, HSP21                                                                                                           |
| GO:0009313                             | oligosaccharide catabolic process                                                    | 0.00366  | AMS1, orf19.4488                                                                                                      |
| GO:0055114                             | oxidation-reduction process                                                          | 0.00402  | OSM1, DES1, HEM13, SUR2, XYL2, ADH5, DOT5, GPH1, FRP1, IFD6                                                           |
| GO:0006879                             | cellular iron ion homeostasis                                                        | 0.00450  | PGA10, RBT5, FRP1                                                                                                     |
| GO:0055072                             | iron ion homeostasis                                                                 | 0.00482  | PGA10, RBT5, FRP1                                                                                                     |
| GO:0044262                             | cellular carbohydrate metabolic process                                              | 0.00698  | DAK2, TPS1, GPH1, HSP21, orf19.4488                                                                                   |
| <b>down-regulated in T1FH</b>          |                                                                                      |          |                                                                                                                       |
| GO:0006768                             | biotin metabolic process                                                             | 7,00E-06 | orf19.2591, HNM3, orf19.2590                                                                                          |
| GO:0009102                             | biotin biosynthetic process                                                          | 7,00E-06 | orf19.2591, HNM3, orf19.2590                                                                                          |
| GO:0043604                             | amide biosynthetic process                                                           | 7,00E-06 | orf19.2591, HNM3, orf19.2590                                                                                          |
| GO:0043603                             | cellular amide metabolic process                                                     | 0.00012  | orf19.2591, HNM3, orf19.2590                                                                                          |
| GO:0051180                             | vitamin transport                                                                    | 0.00106  | orf19.2397, HNM3                                                                                                      |
| GO:0009110                             | vitamin biosynthetic process                                                         | 0.00234  | orf19.2591, HNM3, orf19.2590                                                                                          |
| GO:0042364                             | water-soluble vitamin biosynthetic process                                           | 0.00234  | orf19.2591, HNM3, orf19.2590                                                                                          |
| GO:0006766                             | vitamin metabolic process                                                            | 0.00272  | orf19.2591, HNM3, orf19.2590                                                                                          |
| GO:0006767                             | water-soluble vitamin metabolic process                                              | 0.00272  | orf19.2591, HNM3, orf19.2590                                                                                          |
| GO:0018130                             | heterocycle biosynthetic process                                                     | 0.00445  | CRP1, AAH1, orf19.2591, HNM3, orf19.2590                                                                              |
| GO:0044272                             | sulfur compound biosynthetic process                                                 | 0.00463  | orf19.2591, HNM3, orf19.2590                                                                                          |
| GO:0044271                             | cellular nitrogen compound biosynthetic process                                      | 0.00681  | CRP1, AAH1, orf19.2591, HNM3, orf19.2590                                                                              |
| <b>up-regulated in T1NF and T1FH</b>   |                                                                                      |          |                                                                                                                       |
| GO:0019752                             | carboxylic acid metabolic process                                                    | 2.6e-05  | IDP2, CIT1, MET3, HIS3, orf19.5565, MET14                                                                             |
| GO:0043436                             | oxoacid metabolic process                                                            | 2.6e-05  | IDP2, CIT1, MET3, HIS3, orf19.5565, MET14                                                                             |
| GO:0006082                             | organic acid metabolic process                                                       | 2.6e-05  | IDP2, CIT1, MET3, HIS3, orf19.5565, MET14                                                                             |
| GO:0042180                             | cellular ketone metabolic process                                                    | 3.9e-05  | IDP2, CIT1, MET3, HIS3, orf19.5565, MET14                                                                             |
| GO:0000103                             | sulfate assimilation                                                                 | 0.00010  | MET3, MET14                                                                                                           |
| GO:0055114                             | oxidation-reduction process                                                          | 0.00012  | IDP2, orf19.541, CIT1, MET3, orf19.5565, MET14                                                                        |
| GO:0009086                             | methionine biosynthetic process                                                      | 0.00070  | MET3, MET14                                                                                                           |
| GO:0006555                             | methionine metabolic process                                                         | 0.00093  | MET3, MET14                                                                                                           |
| GO:0006520                             | cellular amino acid metabolic process                                                | 0.00098  | MET3, HIS3, orf19.5565, MET14                                                                                         |
| GO:0000097                             | sulfur amino acid biosynthetic process                                               | 0.00129  | MET3, MET14                                                                                                           |
| GO:0044281                             | small molecule metabolic process                                                     | 0.00129  | IDP2, CIT1, MET3, HIS3, orf19.5565, MET14                                                                             |
| GO:0009067                             | aspartate family amino acid biosynthetic process                                     | 0.00192  | MET3, MET14                                                                                                           |
| GO:0008652                             | cellular amino acid biosynthetic process                                             | 0.00201  | MET3, HIS3, MET14                                                                                                     |
| GO:0000096                             | sulfur amino acid metabolic process                                                  | 0.00228  | MET3, MET14                                                                                                           |
| GO:0009066                             | aspartate family amino acid metabolic process                                        | 0.00282  | MET3, MET14                                                                                                           |
| GO:0044272                             | sulfur compound biosynthetic process                                                 | 0.00387  | MET3, MET14                                                                                                           |
| GO:0016053                             | organic acid biosynthetic process                                                    | 0.00474  | MET3, HIS3, MET14                                                                                                     |
| GO:0046394                             | carboxylic acid biosynthetic process                                                 | 0.00474  | MET3, HIS3, MET14                                                                                                     |
| GO:0006790                             | sulfur compound metabolic process                                                    | 0.00843  | MET3, MET14                                                                                                           |
| <b>up-regulated in T1NF</b>            |                                                                                      |          |                                                                                                                       |
| GO:0009064                             | glutamine family amino acid metabolic process                                        | 0.00016  | PUT1, GUA1, CAR1                                                                                                      |
| GO:0009063                             | cellular amino acid catabolic process                                                | 0.00029  | PUT1, GCV2, CAR1                                                                                                      |
| GO:0009065                             | glutamine family amino acid catabolic process                                        | 0.00067  | PUT1, CAR1                                                                                                            |
| GO:0016054                             | organic acid catabolic process                                                       | 0.00072  | PUT1, GCV2, CAR1                                                                                                      |
| GO:0046395                             | carboxylic acid catabolic process                                                    | 0.00072  | PUT1, GCV2, CAR1                                                                                                      |
| GO:0044282                             | small molecule catabolic process                                                     | 0.00129  | PUT1, GCV2, CAR1                                                                                                      |
| GO:0006520                             | cellular amino acid metabolic process                                                | 0.00499  | PUT1, GUA1, GCV2, CAR1                                                                                                |
| <b>up-regulated in T1FH</b>            |                                                                                      |          |                                                                                                                       |
| GO:0071702                             | organic substance transport                                                          | 1.1e-05  | CDR1, CDR2, HGT17, AAP1, HXT5, SFC1, orf19.7056, MDR1, HGT2, HGT1, NAG4, HGT19, MEP2                                  |
| GO:0008645                             | hexose transport                                                                     | 1.2e-05  | HGT17, HXT5, HGT2, HGT1, NAG4, HGT19                                                                                  |
| GO:0015749                             | monosaccharide transport                                                             | 1.2e-05  | HGT17, HXT5, HGT2, HGT1, NAG4, HGT19                                                                                  |
| GO:0008643                             | carbohydrate transport                                                               | 3.4e-05  | HGT17, HXT5, HGT2, HGT1, NAG4, HGT19                                                                                  |
| GO:0046618                             | drug export                                                                          | 4.8e-05  | CDR1, CDR2, MDR1                                                                                                      |
| GO:0006577                             | amino-acid betaine metabolic process                                                 | 0.00017  | CTN3, orf19.7131, CTN1                                                                                                |
| GO:0009437                             | carnitine metabolic process                                                          | 0.00017  | CTN3, orf19.7131, CTN1                                                                                                |
| GO:0015758                             | glucose transport                                                                    | 0.00080  | HGT17, HGT2, HGT1, HGT19                                                                                              |
| GO:0055085                             | transmembrane transport                                                              | 0.00186  | CDR1, HGT17, AAP1, GEF2, HXT5, SFC1, orf19.7056, MDR1, FRP1, HGT2, HGT1, NAG4, HGT19, MEP2                            |
| GO:0006066                             | alcohol metabolic process                                                            | 0.00188  | CTN3, ERG6, CTN1, ERG27, ERG2, INO1, ATF1                                                                             |
| GO:0015669                             | gas transport                                                                        | 0.00284  | orf19.4459, YHB5                                                                                                      |
| GO:0015671                             | oxygen transport                                                                     | 0.00284  | orf19.4459, YHB5                                                                                                      |
| GO:0070887                             | cellular response to chemical stimulus                                               | 0.00499  | CDR1, SVF1, STE18, DAG7, CDR2, MFALPHA, CAG1, ERG6, RPN4, ERG27, STE3, ERG2, CIP1, MDR1, HGT1, NAG4, orf19.7029, MEP2 |
| GO:0015893                             | drug transport                                                                       | 0.00563  | CDR1, CDR2, MDR1, NAG4                                                                                                |
| GO:0000750                             | pheromone-dependent signal transduction involved in conjugation with cellular fusion | 0.00603  | STE18, CAG1, STE3                                                                                                     |
| GO:0015850                             | organic alcohol transport                                                            | 0.00769  | CDR1, MDR1                                                                                                            |
| GO:0050778                             | positive regulation of immune response                                               | 0.00769  | HGT1, SAP4                                                                                                            |
| GO:0032005                             | signal transduction involved in conjugation with cellular fusion                     | 0.00773  | STE18, CAG1, STE3                                                                                                     |
| GO:0002684                             | positive regulation of immune system process                                         | 0.00978  | HGT1, SAP4                                                                                                            |
| GO:0006855                             | drug transmembrane transport                                                         | 0.00978  | CDR1, MDR1                                                                                                            |
| GO:0006955                             | immune response                                                                      | 0.00978  | HGT1, SAP4                                                                                                            |
| GO:0050776                             | regulation of immune response                                                        | 0.00978  | HGT1, SAP4                                                                                                            |
