# Supplementary material for: Adaptive Mistranslation Accelerates the Evolution of Fluconazole Resistance and Induces Major Genomic and Gene Expression Alterations in Candida albicans
Source: PubMed Central journal article supplement (PMC5549176; doi:10.1128/msphere.00167-17), 2017-08-09
Supplement: sph004172333st9.pdf [file sph004172333st9.pdf]

Table S2A

| T1 LOH              |       |       |              |              |              |       |       |
|---------------------|-------|-------|--------------|--------------|--------------|-------|-------|
|                     | AGC   | AGU   | UCA          | UCC          | UCG          | UCU   | CUG   |
| Average altered     | 0.27  | 1.55  | 0.46         | 0.55         | 0.34         | 1.61  | 0.23  |
| Average other genes | 0.38  | 0.37  | <b>2.08</b>  | <b>0.74</b>  | <b>0.52</b>  | 1.59  | 0.32  |
| SD altered          | 0.30  | 0.63  | 0.73         | 0.31         | 0.25         | 0.68  | 0.24  |
| SD other genes      | 0.41  | 0.71  | 0.85         | 0.59         | 0.50         | 0.85  | 0.39  |
| N° altered          | 62    | 62    | 62           | 62           | 62           | 62    | 62    |
| N° other genes      | 6007  | 6007  | 6007         | 6007         | 6007         | 6007  | 6007  |
| Pvalue              | 0.004 | 0.028 | 0.000        | 0.000        | 0.000        | 0.817 | 0.007 |
| Bonferoni (*7)      | 0.030 | 0.198 | <b>0.001</b> | <b>0.000</b> | <b>0.000</b> | 5.722 | 0.050 |
| T1FH LOH            |       |       |              |              |              |       |       |
|                     | AGC   | AGU   | UCA          | UCC          | UCG          | UCU   | CUG   |
| Average altered     | 0.36  | 1.42  | 2.16         | 0.69         | 0.45         | 1.59  | 0.32  |
| Average other genes | 0.38  | 1.37  | 2.08         | 0.74         | <b>0.53</b>  | 1.59  | 0.32  |
| SD altered          | 0.38  | 0.64  | 0.80         | 0.50         | 0.36         | 0.78  | 0.35  |
| SD other genes      | 0.42  | 0.72  | 0.86         | 0.60         | 0.51         | 0.86  | 0.40  |
| N° altered          | 650   | 650   | 650          | 650          | 650          | 650   | 650   |
| N° other genes      | 5419  | 5419  | 5419         | 5419         | 5419         | 5419  | 5419  |
| Pvalue              | 0.255 | 0.041 | 0.020        | 0.021        | 0.000        | 0.772 | 0.708 |
| Bonferoni (*7)      | 1.000 | 0.284 | 0.143        | 0.147        | <b>0.000</b> | 1.000 | 1.000 |
| T1FH CNV            |       |       |              |              |              |       |       |
|                     | AGC   | AGU   | UCA          | UCC          | UCG          | UCU   | CUG   |
| Average altered     | 0.26  | 1.60  | <b>2.40</b>  | 0.53         | 0.35         | 1.49  | 0.37  |
| Average other genes | 0.38  | 1.37  | 2.08         | <b>0.74</b>  | <b>0.52</b>  | 1.59  | 0.32  |
| SD altered          | 0.40  | 0.73  | 0.98         | 0.52         | 0.47         | 0.82  | 0.37  |
| SD other genes      | 0.41  | 0.71  | 0.85         | 0.59         | 0.50         | 0.85  | 0.39  |
| N° altered          | 110   | 110   | 110          | 110          | 110          | 110   | 110   |
| N° other genes      | 5959  | 5959  | 5959         | 5959         | 5959         | 5959  | 5959  |
| Pvalue              | 0.003 | 0.001 | 0.001        | 0.000        | 0.000        | 0.197 | 0.155 |
| Bonferoni (*7)      | 0.023 | 0.010 | <b>0.007</b> | <b>0.000</b> | <b>0.002</b> | 1.000 | 1.000 |

Table S2B

| T1FH LOH   |      |         |          |          |             |
|------------|------|---------|----------|----------|-------------|
| Orf        | Chr  | Name    | Allele a | Allele b | Diff a vs b |
| orf19.2604 | chrR |         | 3        | 0        | 3           |
| orf19.3214 | chr5 |         | 2        | 0        | 2           |
| orf19.3724 | chrR |         | 1        | 0        | 1           |
| orf19.2391 | chrR |         | 4        | 3        | 1           |
| orf19.3737 | chrR |         | 3        | 2        | 1           |
| orf19.1116 | chr5 |         | 6        | 5        | 1           |
| orf19.2400 | chrR |         | 7        | 6        | 1           |
| orf19.2616 | chrR | UGT51C1 | 4        | 3        | 1           |
| orf19.2401 | chrR |         | 7        | 6        | 1           |
| orf19.3178 | chr5 |         | 4        | 3        | 1           |
| orf19.4251 | chr5 | ZCF22   | 6        | 5        | 1           |
| orf19.3188 | chr5 | TAC1    | 5        | 4        | 1           |
| orf19.4369 | chrR |         | 12       | 11       | 1           |
| orf19.4131 | chr5 |         | 6        | 5        | 1           |
| orf19.1283 | chr5 | MEC1    | 13       | 12       | 1           |
| orf19.935  | chr5 | AGA1    | 3        | 4        | -1          |
| orf19.3919 | chr5 |         | 4        | 5        | -1          |
| orf19.1121 | chr5 |         | 0        | 1        | -1          |
| orf19.3942 | chr5 |         | 1        | 2        | -1          |
| orf19.4279 | chr5 | MNN1    | 2        | 3        | -1          |
| orf19.6297 | chr5 |         | 3        | 4        | -1          |
| orf19.4401 | chrR | YVH1    | 3        | 4        | -1          |
| orf19.1971 | chr5 |         | 1        | 2        | -1          |
| orf19.4221 | chr5 | ORC4    | 2        | 3        | -1          |
| orf19.2832 | chrR | INN1    | 5        | 6        | -1          |
| orf19.2839 | chrR | CIRT4B  | 3        | 4        | -1          |
| orf19.3204 | chr5 |         | 4        | 5        | -1          |
| orf19.3906 | chr5 |         | 1        | 2        | -1          |
| orf19.2540 | chrR | SAS3    | 6        | 7        | -1          |
| orf19.932  | chr5 |         | 3        | 4        | -1          |
| orf19.2521 | chrR |         | 8        | 9        | -1          |
| orf19.4346 | chr5 |         | 12       | 13       | -1          |
| orf19.3190 | chr5 | HAL9    | 6        | 7        | -1          |
| orf19.1958 | chr5 |         | 0        | 2        | -2          |
| orf19.3726 | chrR |         | 5        | 7        | -2          |
| orf19.4257 | chr5 | INT1    | 5        | 7        | -2          |
| T1FH CNV   |      |         |          |          |             |
| Orf        | Chr  | Name    | Allele a | Allele b | Diff a vs b |
| orf19.2371 | chr7 | GAG1    | 7        | 6        | 1           |
| orf19.2372 | chr7 | POL99   | 7        | 6        | 1           |
| orf19.3699 | chr7 | TEP1    | 1        | 0        | 1           |
| orf19.6458 | chr7 |         | 2        | 1        | 1           |
| orf19.6469 | chr7 |         | 13       | 12       | 1           |
| orf19.5775 | chr6 |         | 4        | 5        | -1          |
